# Supplementary material
Source: HighWire-hosted journal article supplement (https://jnis.bmj.com/highwire/filestream/166229/field_highwire_adjunct_files/0/neurintsurg-2020-016943supp001_data_supplement.pdf)
Supplement: neurintsurg-2020-016943supp001_data_supplement.pdf [file neurintsurg-2020-016943supp001_data_supplement.pdf]

**SUPPLEMENTAL MATERIAL (SUPPLEMENTAL TABLES 1 – 4)****Supplemental Table 1 – Predictive Analysis, Periprocedural Aneurysm Rupture/Re-rupture or Perforation (N = 781, with 25 events)**

| <b>Outcome: Periprocedural Aneurysm Rupture/Re-Rupture or Perforation</b> |                                      |
|---------------------------------------------------------------------------|--------------------------------------|
|                                                                           | Odds Ratio [95% Confidence Interval] |
| <b>Multivariate Model using stepwise selection</b>                        |                                      |
| Adjunctive device used: Balloon Assist vs. Coils Only                     | 6.92 [2.15, 22.28] *                 |
| Adjunctive device used: Stent Assist vs. Coils Only                       | 2.92 [0.90, 9.49]                    |
| Packing Density (per 5% increase)                                         | 1.09 [1.01, 1.17] *                  |
| <b>Univariate Models</b>                                                  |                                      |
| Aneurysm Size: Greater or equal to 4mm vs <4mm (Very Small)               | 0.53 [0.22, 1.29]                    |
| Aneurysm Location: Anterior Communicating                                 | 1.76 [0.78, 3.97]                    |
| Ruptured vs Unruptured                                                    | 1.27 [0.55, 2.92]                    |
| Neck width ≥4mm                                                           | 0.46 [0.16, 1.35]                    |
| Wide Neck <sup>δ</sup>                                                    | 0.62 [0.28, 1.38]                    |
| Weekend                                                                   | 1.93 [0.56, 6.65]                    |
| Adjunctive device used: Balloon Assist vs. Coils Only                     | 6.93 [2.17, 22.15] *                 |
| Adjunctive device used: Stent Assist vs. Coils Only                       | 2.8 [0.87, 9.01]                     |
| Packing Density (per 5% increase)                                         | 1.08 [1.01, 1.16] *                  |

Recurrent saccular aneurysms are excluded from these models

\*Significant at alpha=0.05

<sup>δ</sup>Wide neck defined as aneurysms with a dome to neck ratio of <2 or neck width ≥ 4mm

**Supplemental Table 2 – Predictive Analysis, Periprocedural Thromboembolic Event (N = 795, with 41 events)**

| <b>Outcome: Periprocedural Thromboembolic event</b>   |                                             |
|-------------------------------------------------------|---------------------------------------------|
|                                                       | <b>Odds Ratio [95% Confidence Interval]</b> |
| <b>Multivariate Model using stepwise selection</b>    |                                             |
| Aneurysm Location: Bifurcation <sup>†</sup>           | 2.08 [1.07, 4.05]*                          |
| Ruptured Aneurysm                                     | 2.32 [1.23, 4.38]*                          |
| <b>Univariate Models</b>                              |                                             |
| Aneurysm Size: Large-Giant vs. Small-Medium           | 1.44 [0.6,3.41]                             |
| Aneurysm Size: Very Small vs. Small-Medium            | 1.46 [0.67,3.2]                             |
| Aneurysm Location: Bifurcation <sup>†</sup>           | 2.04 [1.06,3.96] *                          |
| Ruptured vs Unruptured                                | 2.28 [1.21,4.29] *                          |
| Neck width ≥4mm                                       | 0.99 [0.5,1.98]                             |
| Weekend                                               | 1.56 [0.53,4.54]                            |
| Adjunctive device used: Balloon Assist vs. Coils Only | 1.05 [0.44,2.47]                            |
| Adjunctive device used: Stent Assist** vs. Coils Only | 0.87 [0.43,1.75]                            |
| Age (per 10 year increase)                            | 0.86 [0.67,1.10]                            |

\*Significant at alpha=0.05

<sup>†</sup>Bifurcation locations are defined as ICA terminus, MCA bifurcation, Anterior Communicating Artery, and Basilar Artery bifurcation

\*\* Stent-assisted category includes flow diverters.

**Supplemental Table 3 – Predictive Analysis, Periprocedural procedure-or-device-related Adverse Events (N = 795; 139 with procedure or device related AEs)**

| <b>Outcome: Periprocedural procedure- or device- related adverse events</b> |                                             |
|-----------------------------------------------------------------------------|---------------------------------------------|
|                                                                             | <b>Odds Ratio [95% Confidence Interval]</b> |
| <b>Multivariate Model using stepwise selection</b>                          |                                             |
| Aneurysm Location: Bifurcation <sup>‡</sup>                                 | 1.82 [1.24, 2.65]*                          |
| Adjunctive device used: Balloon Assist vs. Coils Only                       | 1.86 [1.10, 3.15]*                          |
| Adjunctive device used: Stent Assist** vs. Coils Only                       | 1.79 [1.18, 2.73]*                          |
| <b>Univariate Models</b>                                                    |                                             |
| Aneurysm Size: Large-Giant vs. Small-Medium                                 | 0.69 [0.38,1.25]                            |
| Aneurysm Size: Very Small vs. Small-Medium                                  | 1.18 [0.74,1.89]                            |
| Aneurysm Location: Distal <sup>ϕ</sup>                                      | 1.47 [1.00,2.17]                            |
| Aneurysm Location: Bifurcation <sup>‡</sup>                                 | 1.78 [1.22,2.58] *                          |
| Ruptured vs. Unruptured                                                     | 0.73 [0.48,1.11]                            |
| Neck width ≥4mm                                                             | 0.92 [0.61,1.38]                            |
| Weekend                                                                     | 1.26 [0.63,2.51]                            |
| Adjunctive device used: Balloon Assist vs. Coils Only                       | 1.74 [1.03,2.92] *                          |
| Adjunctive device used: Stent Assist** vs. Coils Only                       | 1.8 [1.18,2.73] *                           |
| Age (per 10 year increase)                                                  | 1.10 [0.95, 1.27]                           |
| Packing density (per 5% increase)                                           | 1.02 [0.97, 1.07]                           |

Recurrent saccular aneurysms are excluded from these models

\* Significant at alpha = 0.05

<sup>‡</sup>Bifurcation locations are defined as ICA terminus, MCA bifurcation, Anterior Communicating Artery, and Basilar Artery bifurcation

<sup>ϕ</sup>Distal locations are defined as aneurysms located in the Anterior Communicating Artery or located distal to the Middle Cerebral Artery (MCA) bifurcation

\*\* Stent-assisted category includes flow diverters.

Supplemental Table 4: Periprocedural Safety in aneurysm patients based on adjunctive technique used

|                                                     | Seriousness | Coils Only       |                  |                 | Stent-Assisted*  |                 |                  | Balloon-Assisted |                |                |
|-----------------------------------------------------|-------------|------------------|------------------|-----------------|------------------|-----------------|------------------|------------------|----------------|----------------|
|                                                     |             | Total            | Ruptured         | Un-ruptured     | Total            | Ruptured        | Un-ruptured      | Total            | Ruptured       | Un-ruptured    |
| Access Site Complications % (n/N)                   | Not Serious | 2.7%<br>(10/368) | 0.6%<br>(1/160)  | 4.3%<br>(9/208) | 4.1%<br>(13/320) | 0.0%<br>(0/21)  | 4.3%<br>(13/299) | 0.0%<br>(0/148)  | 0.0%<br>(0/82) | 0.0%<br>(0/66) |
|                                                     | Serious     | 0.0%<br>(0/368)  | 0.0%<br>(0/160)  | 0.0%<br>(0/208) | 0.6%<br>(2/320)  | 0.0%<br>(0/21)  | 0.7%<br>(2/299)  | 0.0%<br>(0/148)  | 0.0%<br>(0/82) | 0.0%<br>(0/66) |
|                                                     | Total       | 2.7%<br>(10/368) | 0.6%<br>(1/160)  | 4.3%<br>(9/208) | 4.7%<br>(15/320) | 0.0%<br>(0/21)  | 5.0%<br>(15/299) | 0.0%<br>(0/148)  | 0.0%<br>(0/82) | 0.0%<br>(0/66) |
| Aneurysm Rupture/Re-rupture or Perforation %, (n/N) | Not Serious | 0.5%<br>(2/368)  | 0.6%<br>(1/160)  | 0.5%<br>(1/208) | 0.6%<br>(2/320)  | 0.0%<br>(0/21)  | 0.7%<br>(2/299)  | 2.7%<br>(4/148)  | 3.7%<br>(3/82) | 1.5%<br>(1/66) |
|                                                     | Serious     | 0.5%<br>(2/368)  | 0.6%<br>(1/160)  | 0.5%<br>(1/208) | 2.5%<br>(8/320)  | 0.0%<br>(0/21)  | 2.7%<br>(8/299)  | 4.7%<br>(7/148)  | 4.9%<br>(4/82) | 4.5%<br>(3/66) |
|                                                     | Total       | 1.1%<br>(4/368)  | 1.3%<br>(2/160)  | 1.0%<br>(2/208) | 3.1%<br>(10/320) | 0.0%<br>(0/21)  | 3.3%<br>(10/299) | 7.4%<br>(11/148) | 8.5%<br>(7/82) | 6.1%<br>(4/66) |
| Dissection, %, (n/N)                                | Not Serious | 0.0%<br>(0/368)  | 0.0%<br>(0/160)  | 0.0%<br>(0/208) | 0.3%<br>(1/320)  | 0.0%<br>(0/21)  | 0.3%<br>(1/299)  | 0.0%<br>(0/148)  | 0.0<br>(0/82)  | 0.0%<br>(0/66) |
|                                                     | Serious     | 0.3%<br>(1/368)  | 0.0%<br>(0/160)  | 0.5%<br>(1/208) | 0.3%<br>(1/320)  | 0.0%<br>(0/21)  | 0.3%<br>(1/299)  | 0.7%<br>(1/148)  | 0.0<br>(0/82)  | 1.5%<br>(1/66) |
|                                                     | Total       | 0.3%<br>(1/368)  | 0.0%<br>(0/160)  | 0.5%<br>(1/208) | 0.6%<br>(2/320)  | 0.0%<br>(0/21)  | 0.7%<br>(2/299)  | 0.7%<br>(1/148)  | 0.0<br>(0/82)  | 1.5%<br>(1/66) |
| Thromboembolic Events*, % (n/N)                     | Not Serious | 1.6%<br>(6/368)  | 1.9%<br>(3/160)  | 1.4%<br>(3/208) | 1.5%<br>(5/335)  | 4.5%<br>(1/22)  | 1.3%<br>(4/313)  | 4.1%<br>(6/148)  | 4.9%<br>(4/82) | 3.0%<br>(2/66) |
|                                                     | Serious     | 3.5%<br>(13/368) | 6.3%<br>(10/160) | 1.4%<br>(3/208) | 3.3%<br>(11/335) | 9.1%<br>(2/22)  | 2.9%<br>(9/313)  | 1.4%<br>(2/148)  | 2.4%<br>(2/82) | 0.0%<br>(0/66) |
|                                                     | Total       | 5.2%<br>(19/368) | 8.1%<br>(13/160) | 2.9%<br>(6/208) | 4.8%<br>(16/335) | 13.6%<br>(3/22) | 4.2%<br>(13/313) | 5.4%<br>(8/148)  | 7.3%<br>(6/82) | 3.0%<br>(2/66) |

\*Cases involving both balloon- and stent-assisted are included under the stent-assisted category

\*\*For thromboembolic events, cases involving flow diverters are included under the stent-assisted category
